# Supplementary material for: Induction of insulin secretion in engineered liver cells by nitric oxide
Source: PubMed Central journal article supplement (PMC2121102; doi:10.1186/1472-6793-7-11), 2007-10-17

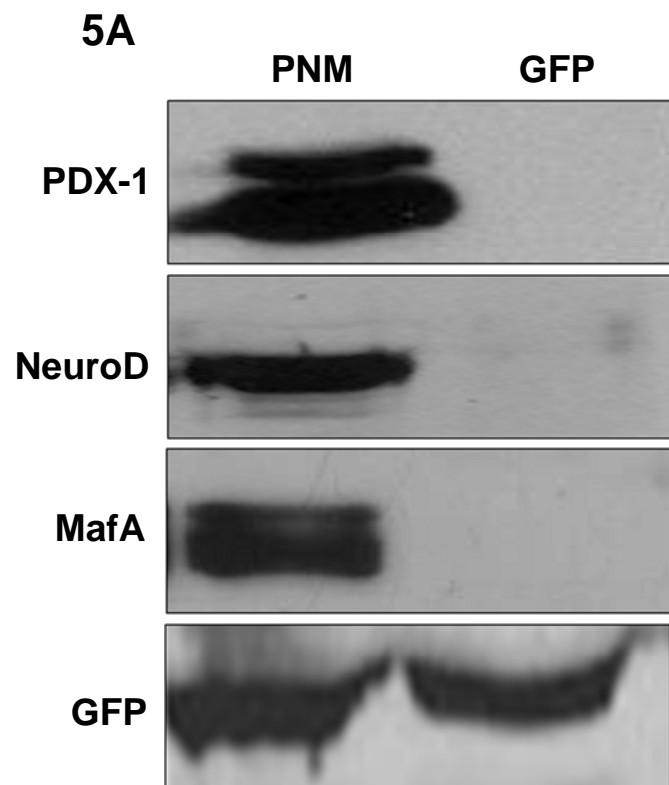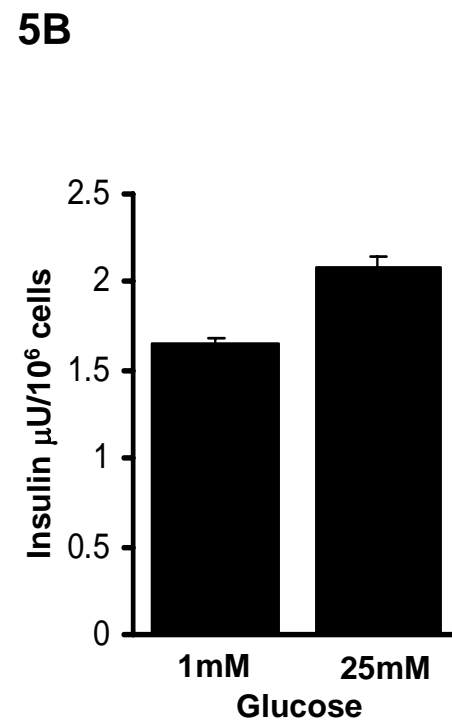

Supplement: 1472-6793-7-11-S5.pdf [file 1472-6793-7-11-S5.pdf]
